# Supplementary material for: Therapeutic Drug Monitoring of Amphotericin-B in Plasma and Peritoneal Fluid of Pediatric Patients after Liver Transplantation: A Case Series
Source: MDPI journal article supplement (doi:10.3390/antibiotics11050640), 2022-05-11
Supplement: s1 [file s1]

**A**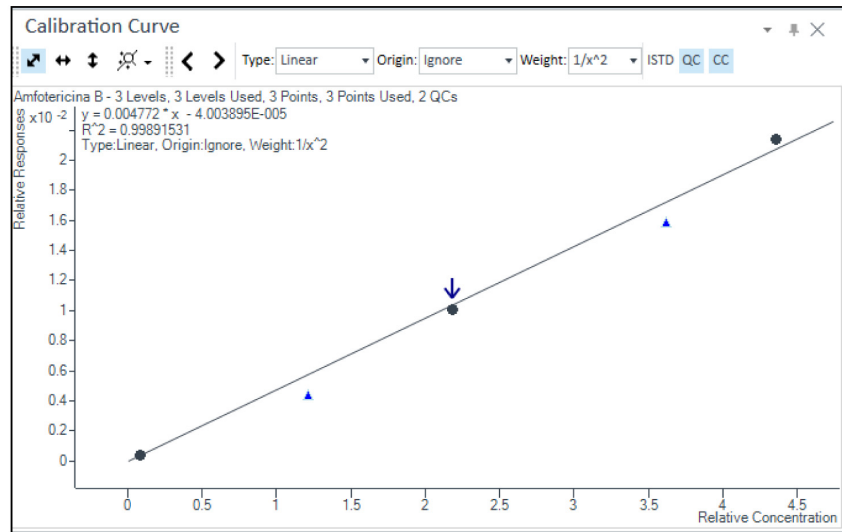**B**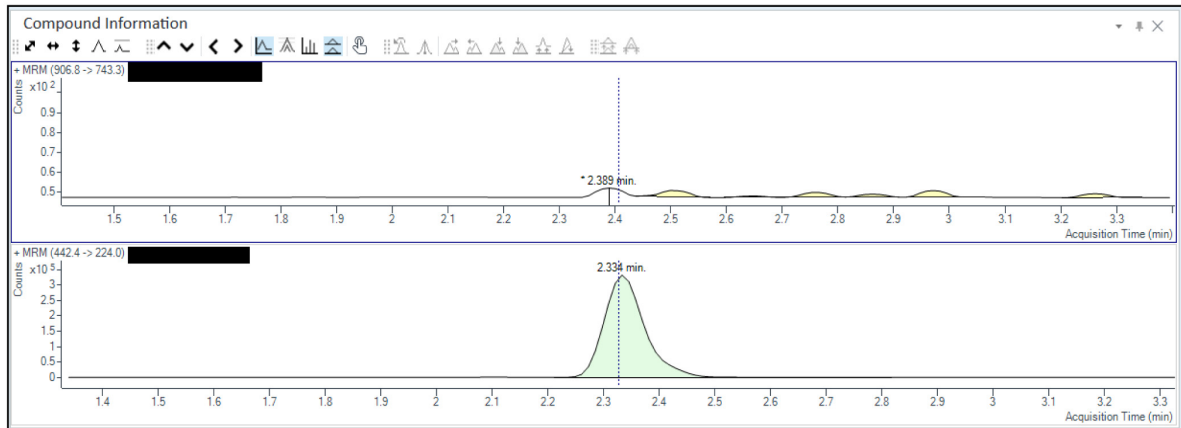**C**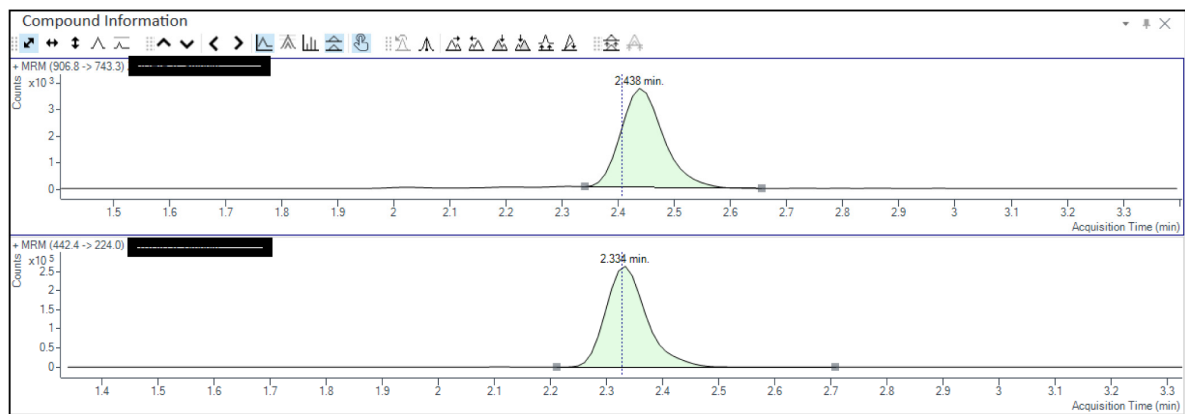

**Supplementary Figure S1.** Selectivity and specificity for amphotericin-B in plasma determined by LC-MS/MS. **(A)** Calibration curve for amphotericin-B. Black dots indicate calibrators, purple arrow indicates calibrator 2 (2.36  $\mu\text{g/mL}$ ) whilst blue triangles represent Low and High QCs. **(B)** Representative chromatogram of plasma sample from a patient treated with Isavuconazole but not amphotericin-B is

reported in the upper layer meanwhile lower layer shows the same samples spiked with an isotopically labeled internal standard (IS). (C) Upper layer shows a representative chromatogram of plasma sample from one patient treated with liposomal amphotericin-B and spiked with IS (lower layer). Black rectangular has been used to hide patients' identity. Retention times for amphotericin-B and IS are 2.438 and 2.334, respectively.
